# Supplementary material
Source: PubMed Central journal article supplement (PMC8363940)

DZ02

Twin A

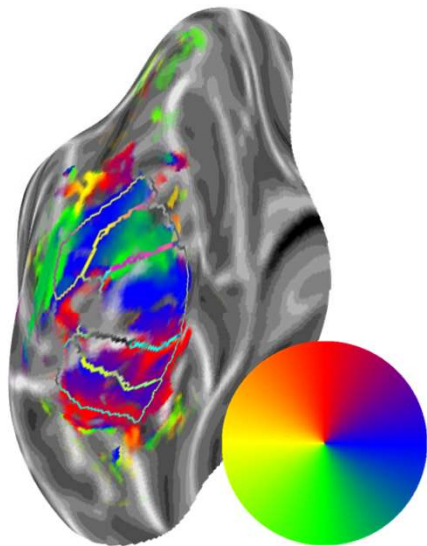

*Polar angle*

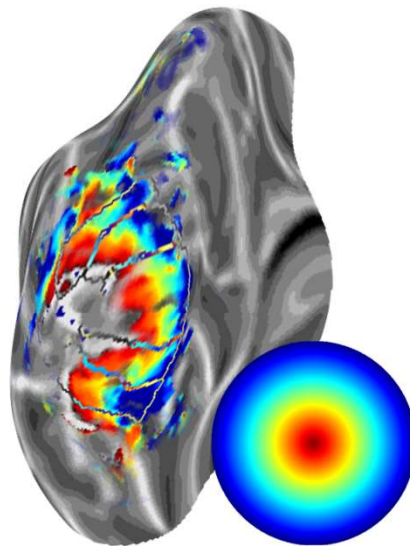

*Eccentricity*

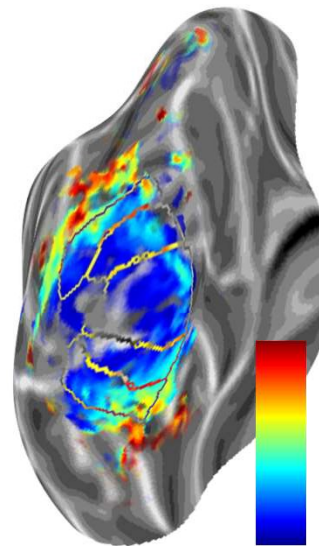

*pRF size*

Twin B

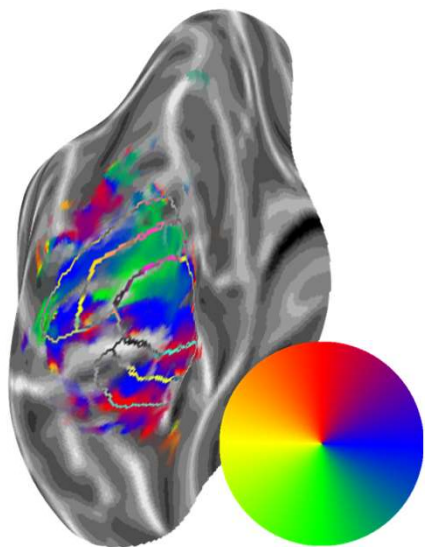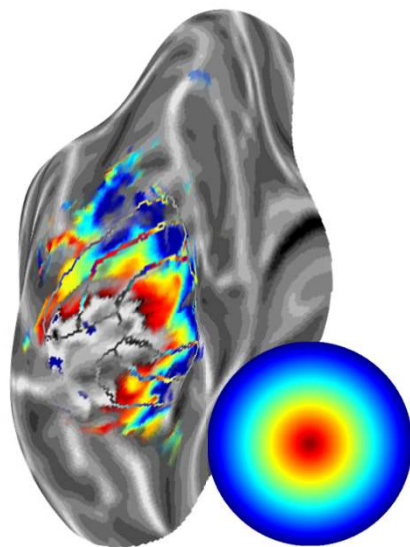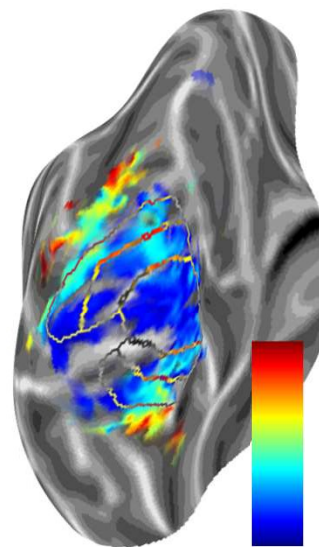

DZ03

Twin A

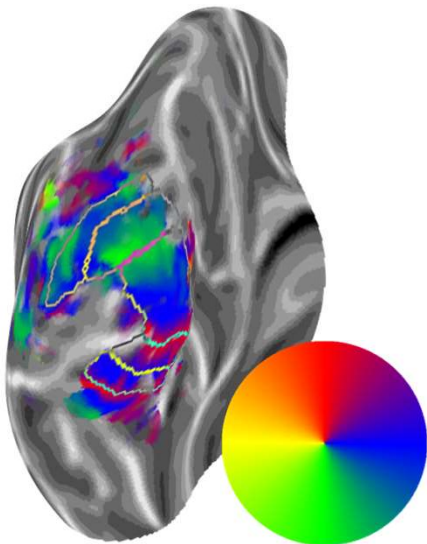

*Polar angle*

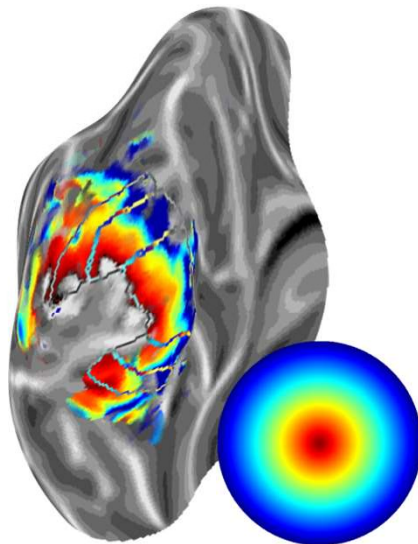

*Eccentricity*

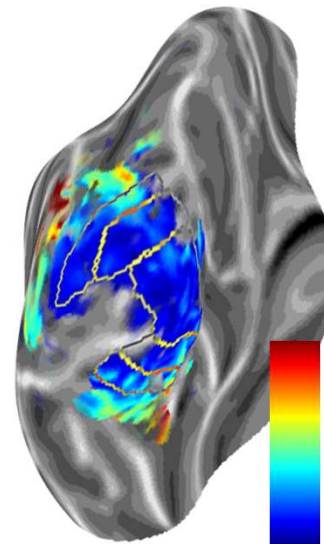

*pRF size*

Twin B

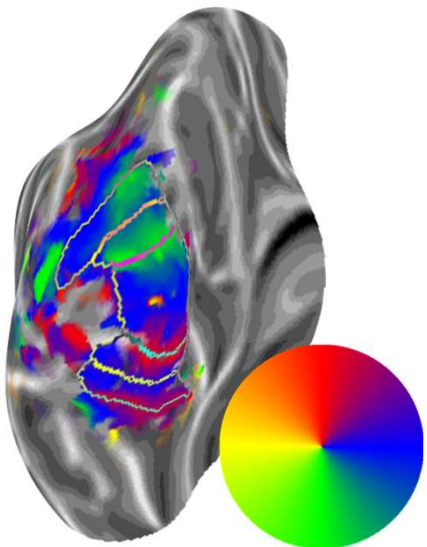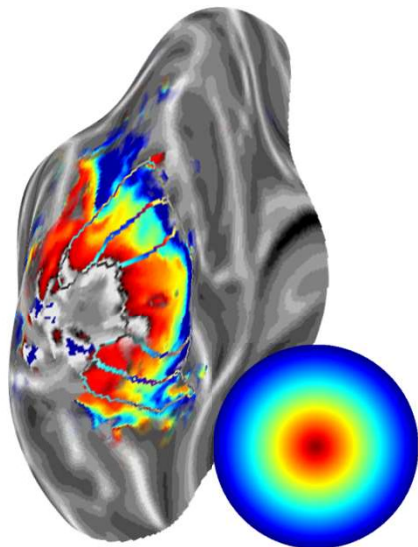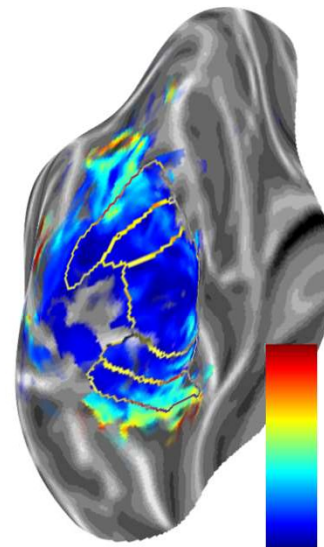

MZ00

Twin A

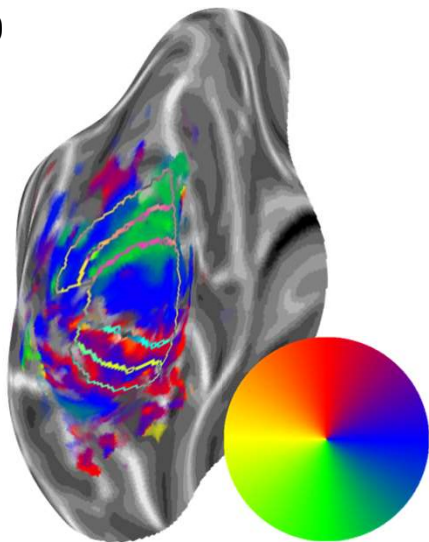

*Polar angle*

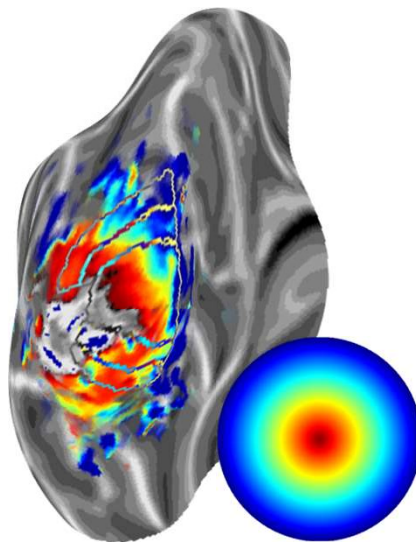

*Eccentricity*

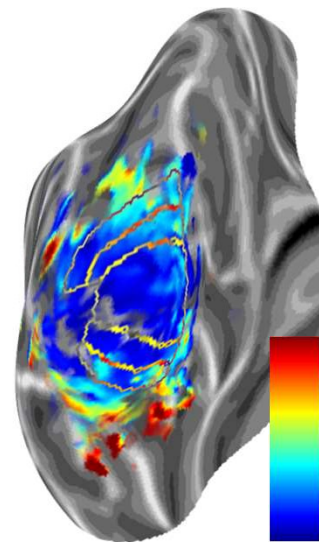

*pRF size*

Twin B

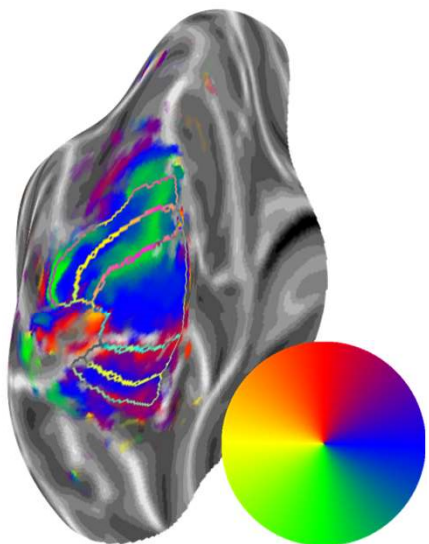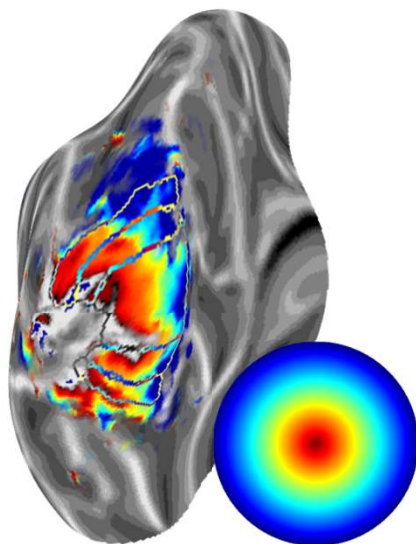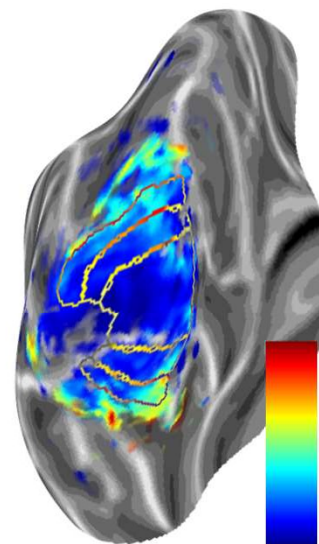

MZ04

Twin A

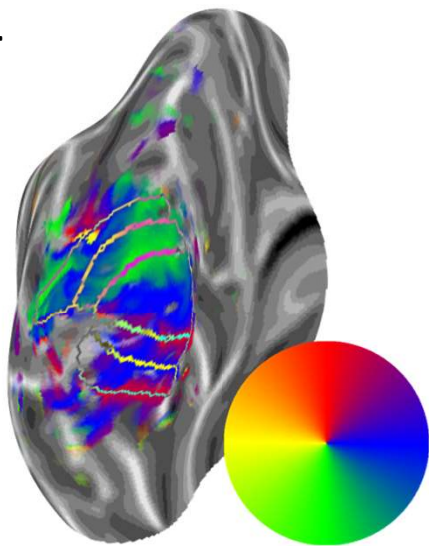

*Polar angle*

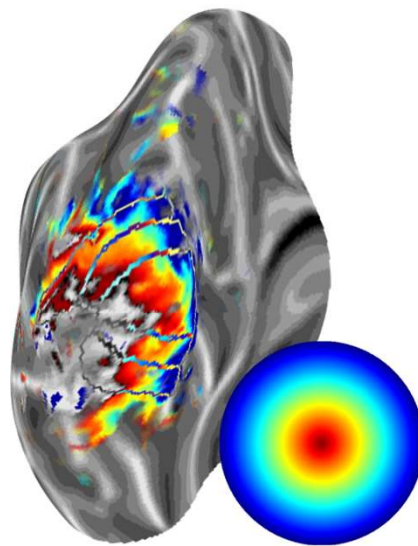

*Eccentricity*

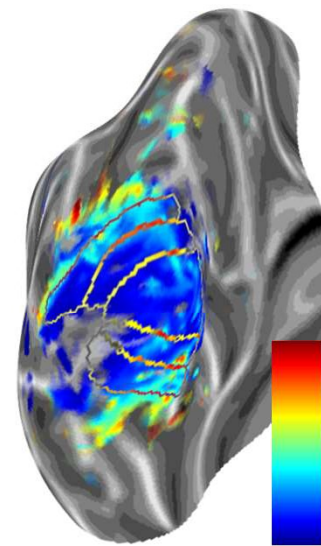

*pRF size*

Twin B

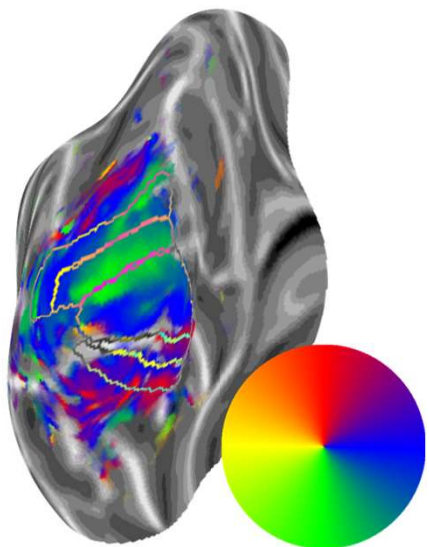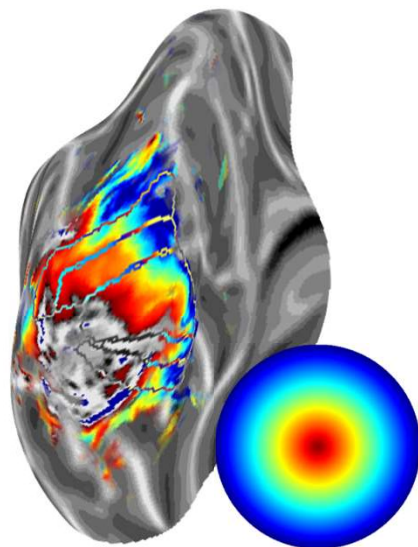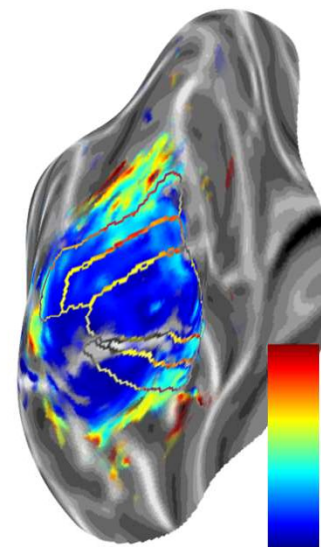

DZ14

Twin A

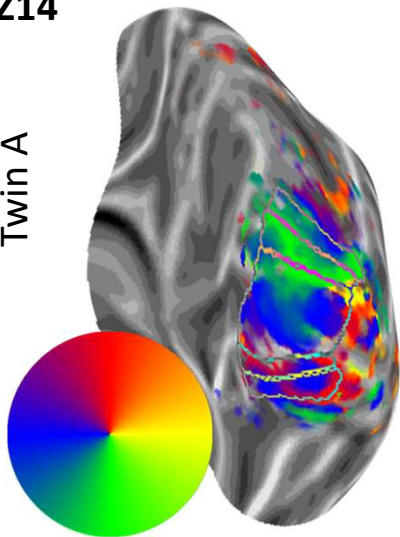

*Polar angle*

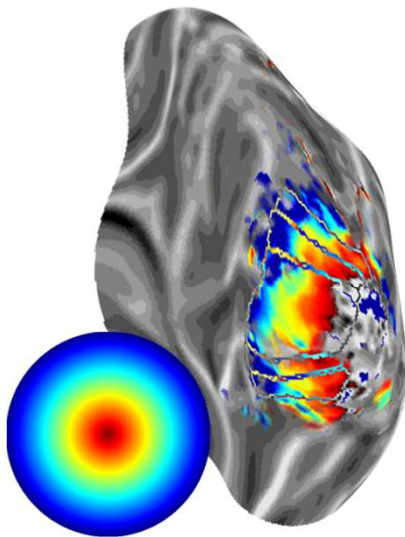

*Eccentricity*

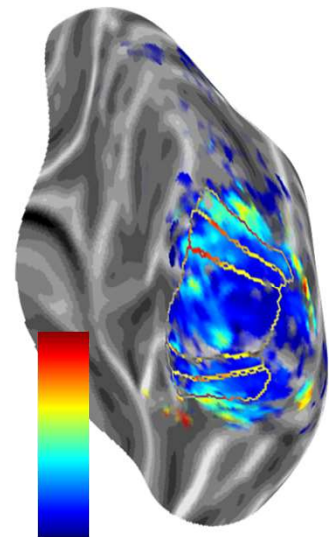

*pRF size*

Twin B

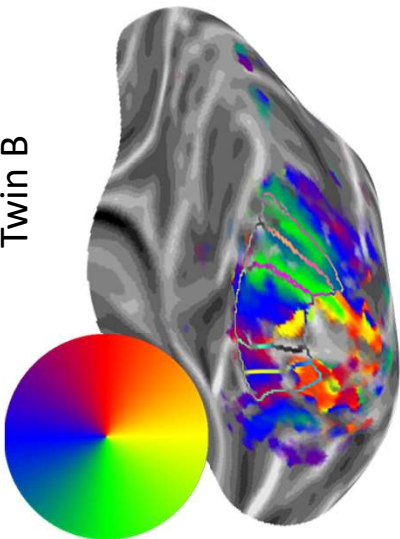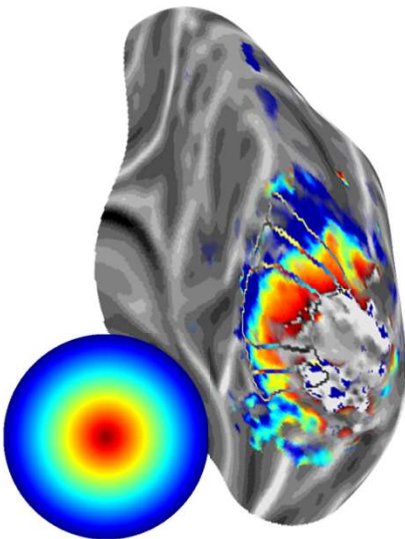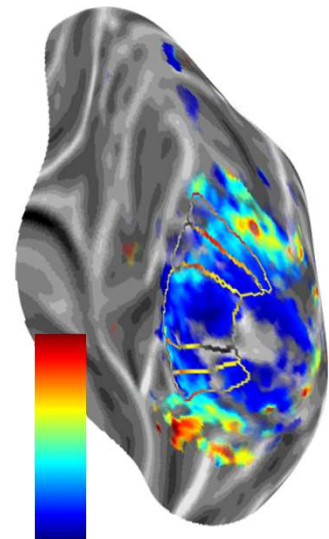

DZ16

Twin A

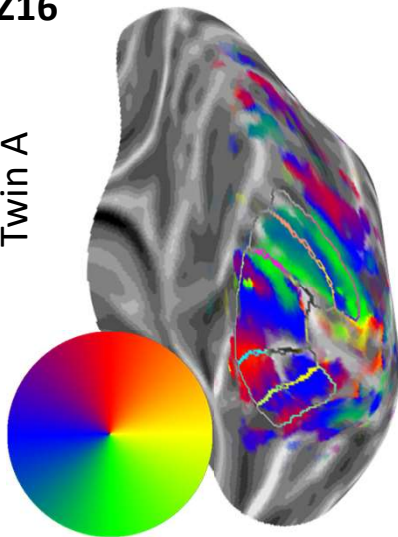

*Polar angle*

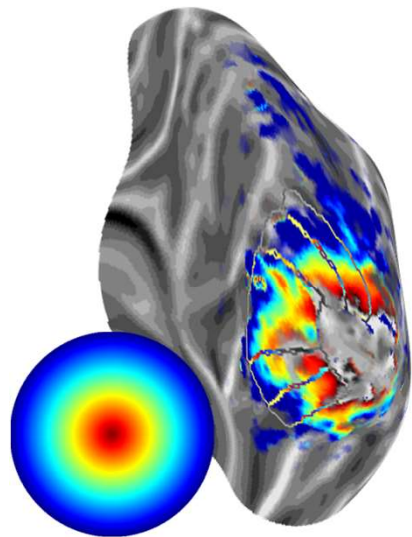

*Eccentricity*

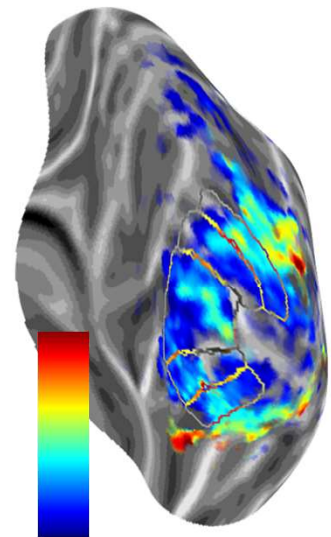

*pRF size*

Twin B

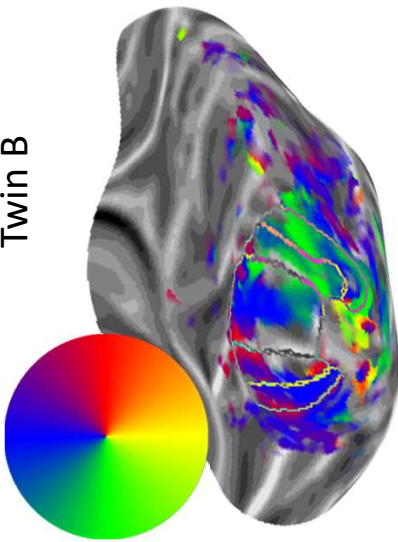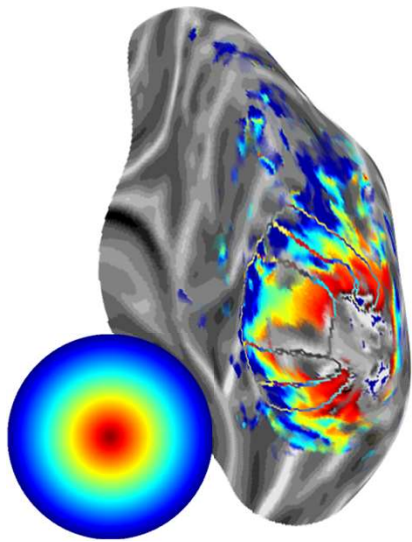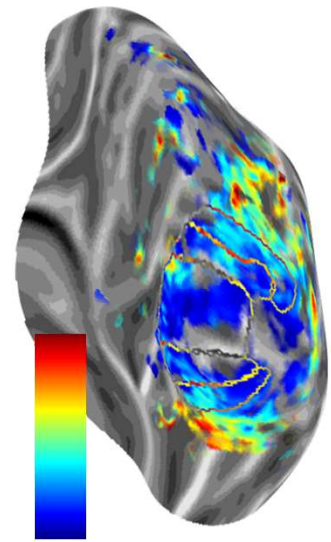

MZ20

Twin A

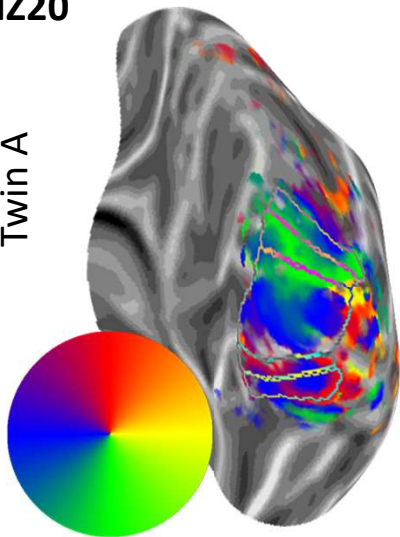

*Polar angle*

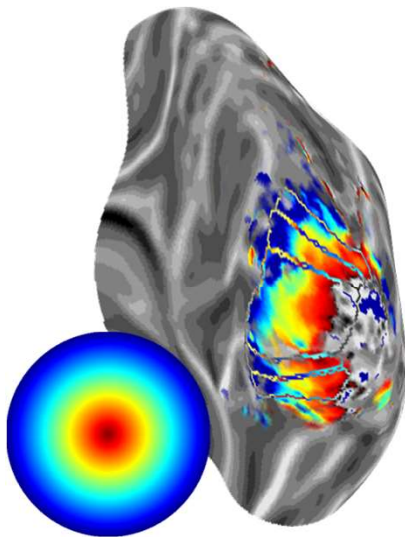

*Eccentricity*

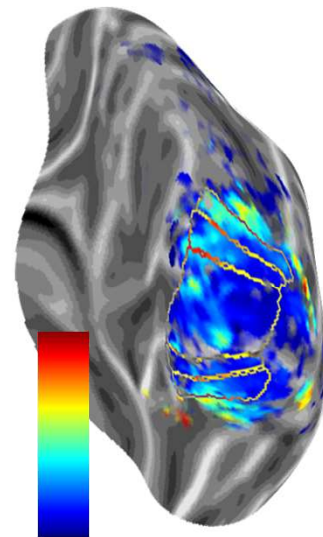

*pRF size*

Twin B

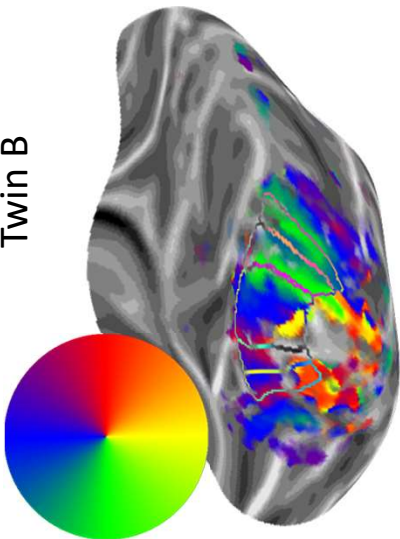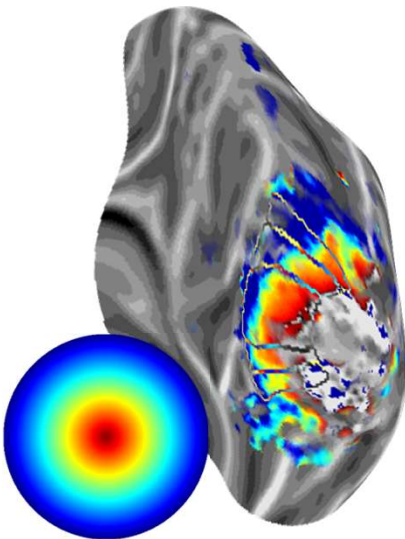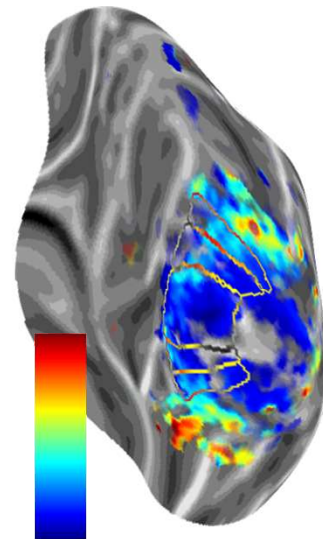

MZ16

Twin A

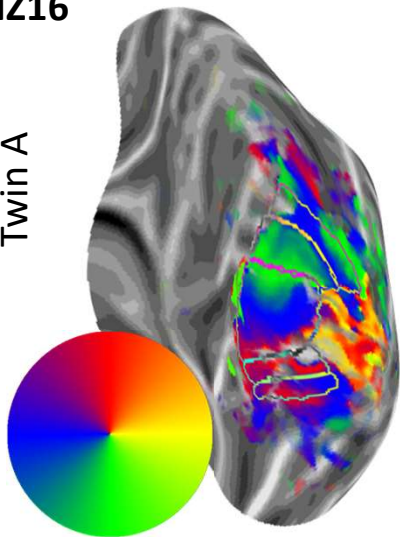

*Polar angle*

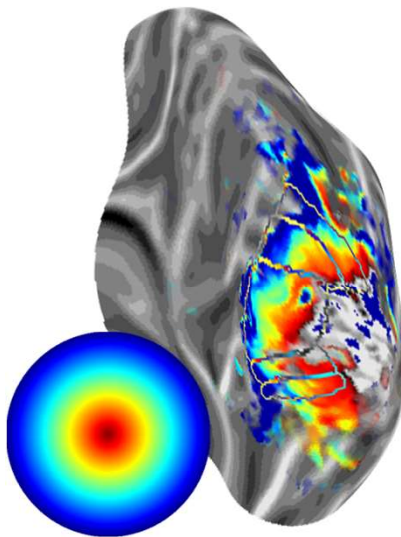

*Eccentricity*

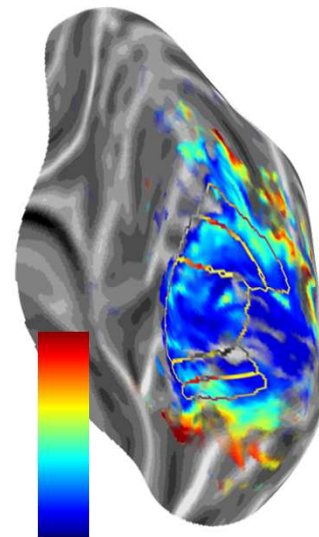

*pRF size*

Twin B

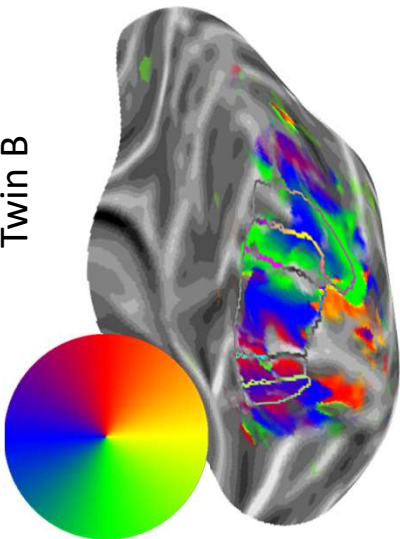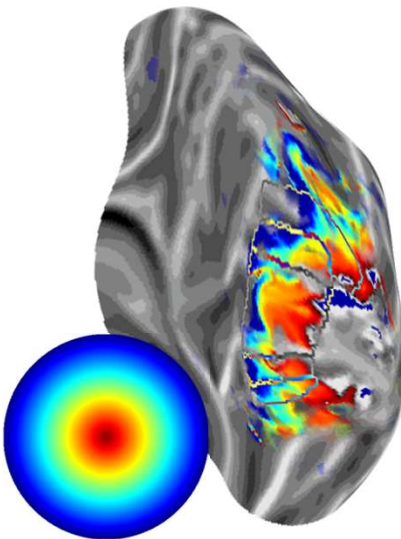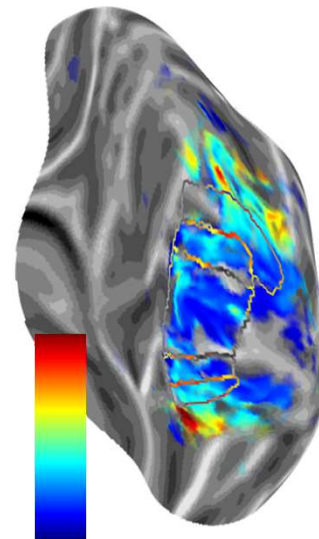

Supplement: mmc2.pdf [file mmc2.pdf]
