# Supplementary material
Source: PubMed Central journal article supplement (PMC8363940)
Supplement: mmc3.pdf [file mmc3.pdf]

## Zygosity Questionnaire

1. My twin's name is: \_\_\_\_\_
2. What type of twin are you?
  - a. Monozygotic (identical)
  - b. Dizygotic (non-identical)
  - c. Don't know
3. During childhood, were you and your twin as alike as 'two peas in a pod' or were you of ordinary family likeness?
  - a. Like 'two peas in a pod'
  - b. Of ordinary family likeness
  - c. Don't know
4. Were you and your twin so similar in appearance at school age that people had difficulty in telling you apart?
  - a. No
  - b. Yes
  - c. Don't remember
5. Who could tell you apart at school age?
  - a. Parents (yes/no)
  - b. Siblings other than twin (yes/no)
  - c. School friends (yes/no)
  - d. Strangers (yes/no)
6. At school, did you use any special mark or emblem to help tell you and your twin apart?
  - a. No
  - b. Yes
  - c. Don't remember
7. How long did you live with your twin?
  - a. I am still living with them
  - b. We lived together until the age of \_\_\_\_\_.
8. Which of you was born first?
  - a. My twin
  - b. Myself
  - c. Don't know
9. Are you one of triplets or quadruplets?
  - a. No
  - b. Yes
10. What is your education level?
  - a. Less than high school
  - b. High school
  - c. Diploma
  - d. Undergraduate
  - e. Postgraduate
11. How much do you agree with this statement: "My twin and I often shared the same friends growing up"?

- a. Strongly disagree
- b. Disagree
- c. Neither agree/disagree
- d. Agree
- e. Strongly agree

12. How much do you agree with this statement: "My twin and I often dressed alike growing up"?

- a. Strongly disagree
- b. Disagree
- c. Neither agree/disagree
- d. Agree
- e. Strongly agree

13. How much do you agree with this statement: "My twin and I were usually in the same school classes *below* the age of 12"?

- a. Strongly disagree
- b. Disagree
- c. Neither agree/disagree
- d. Agree
- e. Strongly agree

14. How much do you agree with this statement: "My twin and I were usually in the same school classes *above* the age of 12"?

- a. Strongly disagree
- b. Disagree
- c. Neither agree/disagree
- d. Agree
- e. Strongly agree

15. How often have you seen your twin in person in the last year?

- a. Not at all
- b. Once or twice
- c. 3-5 times
- d. 6-10 times
- e. 11-20 times
- f. 20+ times

16. How often have you contacted your twin in the last year (e.g. by phone, email, fax, or letter)?

- a. Not at all
- b. Once or twice
- c. Every few months
- d. Monthly
- e. Weekly
- f. Daily

Please let the experimenter know if you have any further questions or information to provide.
